# The Prevalence of Mental Disorders among the Homeless in Western Countries: Systematic Review and Meta-Regression Analysis

Seena Fazel<sup>1\*</sup>, Vivek Khosla<sup>2</sup>, Helen Doll<sup>3</sup>, John Geddes<sup>1</sup>

**1** Department of Psychiatry, University of Oxford, Warneford Hospital, Oxford, United Kingdom, **2** Oxford Clinic, Oxfordshire and Buckinghamshire Mental Health Foundation NHS Trust, Oxford, United Kingdom, **3** Department of Public Health, University of Oxford, Old Road Campus, Oxford, United Kingdom.

**Funding:** There was no specific funding for this project.

**Competing Interests:** The authors report no competing interests.

**Academic Editor:** John McGrath, University of Queensland, Australia

**Citation:** Fazel S, Khosla V, Doll H, Geddes J (2008) The prevalence of mental disorders among the homeless in Western countries: Systematic review and meta-regression analysis. *PLoS Med* 5(12): e225. doi:10.1371/journal.pmed.0050225

**Received:** May 5, 2008

**Accepted:** October 3, 2008

**Published:** December 2, 2008

**Copyright:** © 2008 Fazel et al. This is an open-access article distributed under the terms of the Creative Commons Attribution License, which permits unrestricted use, distribution, and reproduction in any medium, provided the original author and source are credited.

**Abbreviations:** CI, confidence interval; CIDI, Composite International Diagnostic Interview; CIS-R, Clinical Interview Schedule, Revised; DIS, Diagnostic Interview Schedule; DSM, Diagnostic and Statistical Manual of Mental Disorders; ICD, International Classification of Diseases: Classification of Mental and Behavioural Disorders; PSE, Present State Examination; SCID, Structured Clinical Interview for Diagnostic and Statistical Manual; se, standard error

\* To whom correspondence should be addressed. E-mail: seena.fazel@psych.ox.ac.uk

## ABSTRACT

### Background

There are well over a million homeless people in Western Europe and North America, but reliable estimates of the prevalence of major mental disorders among this population are lacking. We undertook a systematic review of surveys of such disorders in homeless people.

### Methods and Findings

We searched for surveys of the prevalence of psychotic illness, major depression, alcohol and drug dependence, and personality disorder that were based on interviews of samples of unselected homeless people. We searched bibliographic indexes, scanned reference lists, and corresponded with authors. We explored potential sources of any observed heterogeneity in the estimates by meta-regression analysis, including geographical region, sample size, and diagnostic method. Twenty-nine eligible surveys provided estimates obtained from 5,684 homeless individuals from seven countries. Substantial heterogeneity was observed in prevalence estimates for mental disorders among the studies (all Cochran's  $\chi^2$  significant at  $p < 0.001$  and all  $I^2 > 85\%$ ). The most common mental disorders were alcohol dependence, which ranged from 8.1% to 58.5%, and drug dependence, which ranged from 4.5% to 54.2%. For psychotic illness, the prevalence ranged from 2.8% to 42.3%, with similar findings for major depression. The prevalence of alcohol dependence was found to have increased over recent decades.

### Conclusions

Homeless people in Western countries are substantially more likely to have alcohol and drug dependence than the age-matched general population in those countries, and the prevalences of psychotic illnesses and personality disorders are higher. Models of psychiatric and social care that can best meet these mental health needs requires further investigation.

*The Editors' Summary of this article follows the references.*

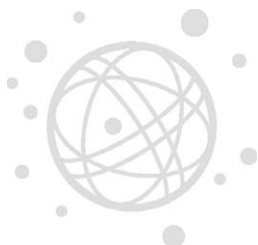

## Introduction

Around 380,000 individuals in the United Kingdom [1] and 740,000 individuals in the United States [2] are reported to be homeless at any given time. Although most live in sheltered accommodation such as emergency hostels, bed and breakfasts, squats, or other temporary accommodation, a recent US report has estimated that 44% are unsheltered, equivalent to over 300,000 people living on the streets [2].

Many studies have reported high prevalences of various health problems among the homeless. Serious physical morbidity, such as tuberculosis and HIV [3], contributes to an increased age-standardised mortality rate of three to four times that in the general population [4,5]. In addition, a number of surveys have found higher rates of serious mental disorders in homeless individuals, but these investigations show at least 10-fold variations in prevalence. Diagnoses of psychosis range from 2% [6] to 31% [7], depression from 4% [8] to 41% [9], and personality disorder from 3% [9] to 71% [10]. It has been argued that sample selection, case definition, and diagnostic criteria contribute to this heterogeneity [11], although this hypothesis does not appear to have been formally tested. Furthermore, the closure of large psychiatric institutions [12], the shortage of low-cost housing [13], and a lack of community-based supports and services [14] over the past few decades is thought to have contributed to increasing homelessness among people with mental illness, with resulting increased levels of psychiatric morbidity amongst homeless people [8,15]. With the continued reduction in the numbers of inpatient psychiatric beds, the number and proportion of mentally disordered homeless persons is anticipated to increase further [16,17].

Apart from contributing to increased rates of mortality, including from suicide [5,18] and drug abuse [4], the presence of serious mental disorders in the homeless is likely to contribute to increased rates of violent victimization [19], criminality [20–22], and longer periods of homelessness [23]. The provision of good mental health care would therefore reduce psychiatric morbidity and have other public health benefits.

More reliable estimates of the prevalence of serious mental disorders in the homeless should help inform public policy and development of psychiatric services, particularly in urban centres. The most recent review of homeless and mental disorders from 2001 was descriptive and did not attempt a quantitative synthesis of the evidence, or explore the heterogeneity between studies [3]. We report a systematic review and meta-regression analysis of psychiatric surveys of homeless populations in Western countries.

## Methods

We searched for surveys that estimated the prevalence of psychotic illness, major depression, personality disorder, alcohol dependence, and substance dependence in homeless people, published between January 1966 and December 2007. We searched computer-based literature indexes (EMBASE, MEDLINE, PsycINFO), scanned relevant reference lists, searched relevant journals by hand, and corresponded with authors. For the database search, we used combinations of keywords relating to psychiatric illnesses (e.g., mental\*, psych\*, depress\*, substance/drug\*/alcohol\* abuse/depend-

ence, personality) and being homeless (e.g., homeless\*, roofless, shelter\*). Non-English articles were translated. MOOSE guidelines were followed (Text S1).

For inclusion into the systematic review, the studies had to meet the following criteria: (1) A clear definition of homelessness was included; (2) standardized diagnostic criteria for psychiatric disorders using the International Classification of Diseases: Classification of Mental and Behavioural Disorders (ICD) or Diagnostic and Statistical Manual of Mental Disorders (DSM) were used; (3) psychiatric diagnosis was made by clinical examination or interviews using validated diagnostic instruments; (4) prevalence rates for psychiatric disorders within the previous six months were included, except for personality disorder where lifetime diagnoses were used; (5) study location was in North America, Western Europe, Australia, and New Zealand.

Surveys with less than a 50% response rate were excluded, as were surveys on selected populations (for example, a sample of homeless people referred to a psychiatric outpatient clinic or single mothers [24]) or where diagnosis of psychiatric disorders was not obtained by direct interviews (for example, by self report or case note review) or was only reported as 12-mo or lifetime diagnoses [16,25–29]. Studies that selected solely elderly or juvenile people were excluded [30,31]. All the included reports were based on interviews with individuals. We identified one study that interviewed families, but this was excluded as it was based on a selected sample [32].

Information on geographical location; year of interview; definition of homelessness; method of sample selection; sample size; average age; diagnostic instrument; diagnostic criteria, type of interviewer, participation rate; and numbers diagnosed with psychotic illness, major depression, personality disorder, alcohol dependence, and drug dependence was extracted independently from every eligible study. If required, further clarifications were sought by correspondence with authors of relevant studies.

Prevalence estimates were calculated using the variance stabilising double arcsine transformation [33], because of the use of the inverse variance weight in fixed-effects meta-analysis is suboptimal when dealing with binary data with low prevalences. In addition, the transformed prevalences are weighted very slightly towards 50% and studies with zero prevalence can thus be included in the analysis. Confidence intervals (CIs) around these estimates were calculated using the Wilson method [34] since the asymptotic method produces intervals which can extend below zero [35]. Heterogeneity among studies was estimated using Cochran's  $Q$  (reported with a  $\chi^2$ -value and  $p$ -value) and the  $I^2$  statistic, the latter describing the percentage of variation across studies that is due to heterogeneity rather than chance [36,37], and presented with a 95% CI [37].  $I^2$ , unlike  $Q$ , does not inherently depend upon the number of studies considered, with values of 25%, 50%, and 75% taken to indicate low, moderate, and high levels of heterogeneity, respectively. Where heterogeneity was high ( $I^2 > 75\%$ ), random effects models were used for summary statistics [36]. In situations with high between-study heterogeneity, the use of random effects models (where the individual study weight is the sum of the weight used in a fixed effects model and the between-study variability) produces study weights that primarily reflect the between-study variation and thus provide close

to equal weighting. The use of the arcsine-transformed prevalence estimates consequently had little material difference on the value of the overall random effects estimates, which were themselves found to be notably different (closer to 50%) from the fixed effects estimates in which smaller prevalences have smaller standard errors and thus greater weight. Potential sources of heterogeneity were investigated further by arranging groups of studies according to potentially relevant characteristics and by meta-regression analysis. Factors examined both individually and in multiple variable models were instrument (semistructured instrument versus clinical examination only), interviewer (conducted by mental health clinician or not), period (decade of study: 1970s, 1980s, 1990s, and 2000s), study size (both a continuous variable and as a categorical variable in increments of  $n = 50$  and  $n = 100$ , and also as  $n < 200$  versus  $n \geq 200$ ), sex (as appropriate, e.g., male versus female; mixed versus male versus female), geographical region (as appropriate, e.g., mainland Europe versus rest of Western countries), and participation rates (classified into those  $>85\%$  and those  $\leq 85\%$ ). Because of low prevalence and small sample size for some studies, only those factors significant ( $p < 0.10$ ) individually were entered into a multiple regression model to avoid model instability. The regression coefficients for each study characteristic on individual analysis were provided to enable comparison across diagnoses. All analyses were done in STATA statistical software package, version 10 (Statacorp, 2007) using the commands `propcii` (to calculate Wilson CIs), `metan` (for random effects meta-analysis, specifying either two or three variables: double arcsine transformed prevalence and its variance, or double arcsine transformed prevalence and Wilson CIs), and `metareg` (for meta-regression).

## Results

The final sample consisted of 29 studies published between 1979 and 2005 (Table 1) [6–10,38–59]. The studies included a total of 5,684 homeless individuals. Eleven reports reported data on men ( $n = 1,827$ ) [7,38,40–43,45,47–49,60], 14 included mixed gender samples ( $n = 3,381$ ) [6,8,39,44,50–54,61], and four investigated women ( $n = 476$ ) [9,10,40,55]. In the surveys with mixed samples, 82% of the individuals were men (weighted average). The weighted average age of men (reported in eight reports) and women (from four reports) was 41.2 and 33.8 y, respectively. Average age of the mixed samples was 40.1 y (from ten studies). Ten studies were published before 1990 [6–8,10,39,40,42,45,46,49]. Ten reports were from the US ( $n = 2,019$ ) [6,8,10,38,39,42,49,51,52,55], eight from the UK ( $n = 1,645$ ) [7,44,45,53,56–58,61], six from Germany ( $n = 624$ ) [9,41,47,48,59,60], two from Australia ( $n = 473$ ) [40,46], and one each from France ( $n = 715$ ) [50], The Netherlands ( $n = 150$ ) [43], and Greece ( $n = 58$ ) [54].

Different sampling strategies (random methods, consecutive sampling or total sampling) were used in surveys, apart from two reports that did not provide information on sampling method [59,60]. Of the 5,684 homeless individuals, 952 were selected primarily from shelters for the homeless, 583 from hostels for the homeless, and the rest from a mixture of settings including day centres, soup kitchens, missions, streets, and shelters. Eight studies reported response rate of above 90% [6–8,38,45,49,53,55], the others were mostly above 70%. Three reports did not provide

response rates [54,56,61], a further one did not cite the response rate for part of the sample [40], and five surveys reported response rates between 60% and 70% [42–44,47,52].

In six surveys, diagnosis of psychotic illness, major depression, personality disorder, alcohol dependence, and drug dependence was made by clinical examination without the use of diagnostic instruments ( $n = 600$ ) [7,8,10,51,54]. Validated semistructured diagnostic instruments used included: Diagnostic Interview Schedule (DIS) ( $n = 1,455$ ) [6,9,38,39,52,55]; Clinical Interview Schedule, Revised (CIS-R) ( $n = 1,090$ ) [57,58]; Structured Clinical Interview for Diagnostic and Statistical Manual (SCID) ( $n = 1,081$ ) [40,41,47,56,59]; Present State Examination (PSE) ( $n = 394$ ) [44,45,49,53], and the Composite International Diagnostic Interview (CIDI) ( $n = 724$ ) [43,48,50]. Three other studies used clinical semistructured interviews [48,60,61].

## Psychotic Illness

Psychotic illness was reported in 28 surveys with a random effects pooled prevalence of 12.7% (95% CI 10.2%–15.2%) [6–10,38–56,60,61]. Estimates ranged from 2.8% to 42.3% with substantial heterogeneity among the estimates ( $\chi^2 = 237.7$ ,  $p < 0.001$ ,  $I^2 = 88.6\%$ , 95% CI 84.8%–91.5%). Higher prevalences were found in smaller studies (Figure 1). We further explored study region, grouping studies according to whether they were based in mainland Europe, UK, US, or Australasia (Figure 2). In individual variable meta-regression analyses, surveys in which the interviewer was a mental health clinician (versus a lay interviewer) had higher prevalences of psychosis ( $\beta = 0.08$ , standard error [ $se(\beta)$ ] = 0.04,  $p = 0.042$ ), where the participation rates were lower ( $<85\%$ ) had lower prevalences ( $\beta = -0.06$ ,  $se[\beta] = 0.03$ ,  $p = 0.071$ ) (Figure 3), and where the study size was 200 or more participants (versus fewer than 200) had lower prevalences ( $\beta = -0.08$ ,  $se[\beta] = 0.04$ ,  $p = 0.055$ ) (Table 2). In a meta-regression model including these three characteristics, only the participation rate remained significant: lower participation rates were associated with lower prevalences ( $\beta = -0.08$ ,  $se[\beta] = 0.03$ ,  $p = 0.015$ ).

## Major Depression

We identified 19 surveys that reported major depression with a random effects pooled prevalence estimate of 11.4% (95% CI 8.4%–14.4%) (Figure 4) [8–10,38–41,43,47–49,51–53,55–58,61]. The prevalence estimates ranged from 0.0% to 40.9% and there was substantial heterogeneity among those estimates ( $\chi^2 = 160.6$ ,  $p < 0.001$ ,  $I^2 = 88.8\%$ , 95% CI 84.0%–92.2%). Four factors were associated with this heterogeneity on meta-regression: the interview being conducted by a mental health clinician, where there were lower prevalences ( $\beta = -0.06$ ,  $se[\beta] = 0.04$ ,  $p = 0.058$ ); the study being conducted in mainland Europe compared with the rest of the world ( $\beta = -0.09$ ,  $se[\beta] = 0.04$ ,  $p = 0.024$ ); sex (coded as female, male, mixed), with men and mixed samples having progressively lower prevalences than women ( $\beta = -0.05$ ,  $se[\beta] = 0.02$ ,  $p = 0.043$ ); and participation rate, with lower participation rates being associated with higher prevalences ( $\beta = 0.13$ ,  $se[\beta] = 0.03$ ,  $p < 0.001$ ) (Table 2). In a meta-regression model including these four characteristics, only the participation rate remained significant: lower participation rates were associated with higher prevalences ( $\beta = 0.11$ ,  $se[\beta] = 0.03$ ,  $p = 0.002$ ).

**Table 1.** Details of Studies on Prevalence of Mental Disorders in the Homeless

| Study                        | Country   | Year      | Sampling Strategy                                                        | Sampling Method                                     | Instrument                    | Diagnostic Criteria | Mean Age (Years) | Age Range  | Psychiatric Interviewer | Dropout Rate (%) |
|------------------------------|-----------|-----------|--------------------------------------------------------------------------|-----------------------------------------------------|-------------------------------|---------------------|------------------|------------|-------------------------|------------------|
| Adams, 1996 [56]             | UK        | 1991      | Hostels                                                                  | All residents                                       | SCID                          | DSM-III-R           | 44               | Not stated | Y                       | Not stated       |
| Bassuk, 1984 [8]             | US        | 1983      | Shelter population                                                       | All residents in a shelter                          | Clinical interview            | DSM-III             | 34               | 4–68       | Y                       | 0                |
| Bassuk, 1986 [10]            | US        | 1985      | Shelter population                                                       | All residents in a shelter                          | Clinical interview            | DSM-III             | 27               | 17–49      | Y                       | 21.0             |
| Bellavia, 1999 [52]          | US        | 1999      | Shelter and a soup kitchen                                               | Random                                              | DIS                           | DSM-III             | Not stated       | Not stated | N                       | 37.0             |
| Doutney, 1985 [46]           | Australia | 1983      | Shelter                                                                  | Random                                              | Clinical interview            | DSM-III             | Not stated       | Not stated | Y                       | 23.0             |
| Elkeimann, 1992 [60]         | Germany   | 1990      | Shelters                                                                 | Not stated                                          | Semistructured interview      | ICD-9               | 45               | Not stated | Y                       | 21.0             |
| Fichter, 2001 [41]           | Germany   | 1994–1996 | Shelters, free meals, or living on the streets                           | Stratified random                                   | SCID-I                        | DSM-IV              | 45               | 18–68      | N                       | 12.0             |
| Fischer, 1986 [6]            | US        | 1981–1982 | Residents in four missions                                               | Random                                              | DIS                           | DSM-III             | 41               | Not stated | N                       | 2.0              |
| Freeman, 1979 [49]           | US        | 1970s     | Mission                                                                  | Random                                              | PSE (9th ed)                  | DSM                 | 52 (median)      | Not stated | Y                       | 0                |
| Geddes, 1994 [44]            | UK        | 1992      | Homeless hostels                                                         | Random                                              | PSE, semistructured interview | DSM-III-R           | 51               | Not stated | N                       | 31.0             |
| Gill, 1996a [57]             | UK        | 1994      | Day centres                                                              | Random                                              | CIS-R, SCAN                   | ICD-10              | Not stated       | Not stated | Y                       | 22.0             |
| Gill, 1996b [57]             | UK        | 1994      | Night shelters                                                           | Random                                              | CIS-R, SCAN                   | ICD-10              | Not stated       | Not stated | Y                       | 15.0             |
| Gill, 1996c [57]             | UK        | 1994      | Hostels for the homeless                                                 | Random                                              | CIS-R, SCAN                   | ICD-10              | Not stated       | Not stated | Y                       | 30.0             |
| Greifenhagen, 1997 [9]       | Germany   | 1997      | Shelters, soup kitchen, treets                                           | Stratified random                                   | DIS-3                         | DSM-III             | 35.5             | 19–57      | N                       | 11.0             |
| Haugland, 1997 [51]          | US        | 1993      | Shelter                                                                  | Consecutive on arrival                              | Clinical interview            | DSM-III-R           | 37               | Not stated | N                       | 23.0             |
| Herman, 1989 [40]            | Australia | 1987      | Shelters, special accommodation for homeless, and low cost accommodation | One in two random sample                            | SCID-R                        | DSM-III-R           | 52               | 15–60      | Y                       | 34.0             |
| Kershaw, 2000 [58]           | UK        | 1999      | Hostels and drop in centres                                              | Random                                              | CIS-R, AUDIT                  | ICD-10              | Not stated       | Not stated | N                       | 22.0             |
| Koegel, 1988 [39]            | US        | 1988      | Shelter, day centre, free meals                                          | Random                                              | DIS                           | DSM-III             | 38.1             | Not stated | N                       | 15.0             |
| Konstantakopoulos, 2003 [54] | Greece    | 2002      | Homeless support centre                                                  | Whole population                                    | Clinical interview            | DSM-IV              | Not stated       | 20–67      | Y                       | Not stated       |
| Kovess, 1999 [50]            | France    | 1996      | Shelter and food kitchens                                                | Stratified random                                   | CIC/CIDIS                     | ICD-10              | 39               | Not stated | N                       | 15.0             |
| Langle, 2005 [47]            | Germany   | 2002      | Registered as homeless, contacts, streets                                | Whole population                                    | SCID                          | ICD-10              | 44               | 19–71      | Y                       | 40.0             |
| Newton, 1994 [61]            | UK        | 1992      | Soup kitchen, drop in centres, and streets                               | Whole population                                    | Semistructured interview      | ICD-9               | 40               | 17–72      | Y                       | Not stated       |
| Reinking, 2001 [43]          | Holland   | 1998      | Centres for homeless                                                     | Random                                              | CIDI                          | DSM-III-R           | 38               | Not stated | N                       | 32.0             |
| Salize, 2002 [59]            | Germany   | 1997–1999 | Facilities for the homeless                                              | Not stated                                          | SCID                          | DSM-IV              | 40               | 18–69      | Y                       | 20.0             |
| Sclaire, 1997 [53]           | UK        | 1989–1990 | Short stay hostels for homeless                                          | Random                                              | PSE, MAST                     | ICD-9               | 34               | 16–63      | Y                       | 6.0              |
| Smith, 1992 [38]             | US        | 1989      | Shelters, streets, and those with no stable residence                    | Random                                              | DIS/HS                        | DSM-III-R           | 36               | Not stated | N                       | 9.0              |
| Smith, 1993 [55]             | US        | 1989      | Shelters and day centres                                                 | Random                                              | DIS/HS                        | DSM-III-R           | 29               | Not stated | N                       | 3.0              |
| Susser, 1989 [42]            | US        | 1985      | Shelter                                                                  | Consecutive at reception                            | SCID-PD and CES-D             | DSM-III-R           | 31.2             | Not stated | N                       | 34.0             |
| Timms, 1989 [7]              | UK        | 1986–1987 | Homeless hostel over a 7 mo period                                       | Consecutive at reception and all existing residents | PSE and clinical interview    | DSM-III-R           | 49.5             | Not stated | Y                       | 7.0              |
| Vollm, 2003 [48]             | Germany   | 1996      | Shelter or rough sleepers                                                | Consecutive                                         | Semistructured interview      | ICD-10              | 41.4             | 30–51      | Y                       | 18.5             |
| Weller, 1987 [45]            | UK        | 1986      | Shelter                                                                  | Consecutive sampling of visitors                    | Clinical interview            | Not stated          | 46               | Not stated | Not stated              | 9.0              |

HS, Homeless Supplement; MAST, Michigan Alcoholism Screening Test; SCAN, Structured Clinical Assessments for Neuropsychiatry. doi:10.1371/journal.pmed.0050225.t001

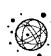

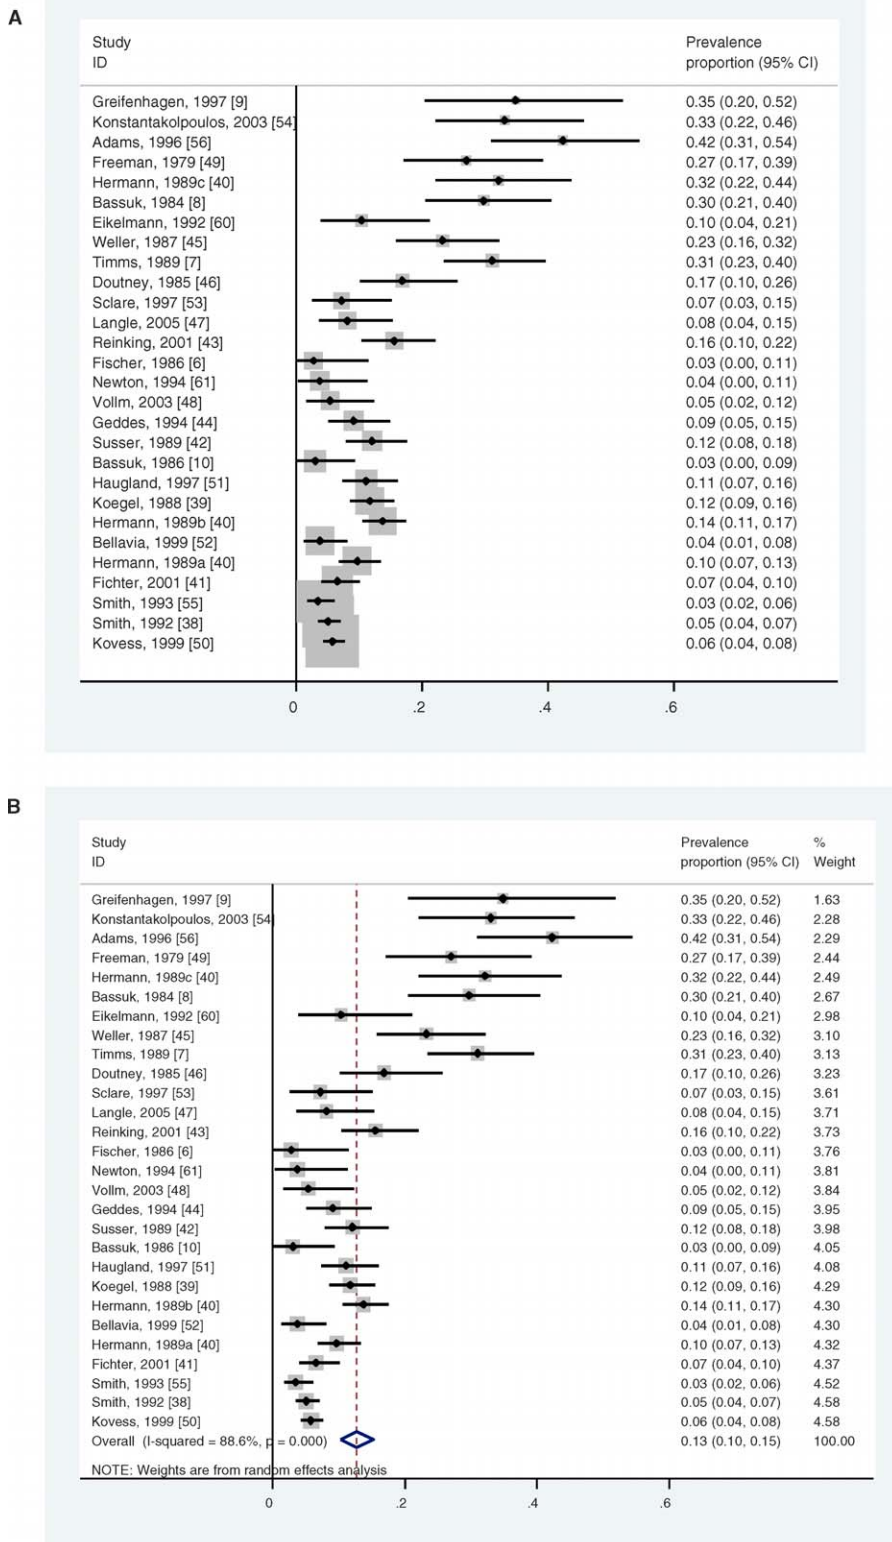

**Figure 1.** Prevalence of Psychosis in Homeless Persons

(A) Studies are ordered by increasing study weight in a fixed effects model without calculation of an overall estimate.

(B) Studies are ordered by increasing study weight and show the overall estimate calculated from random effects meta-analysis.

doi:10.1371/journal.pmed.0050225.g001

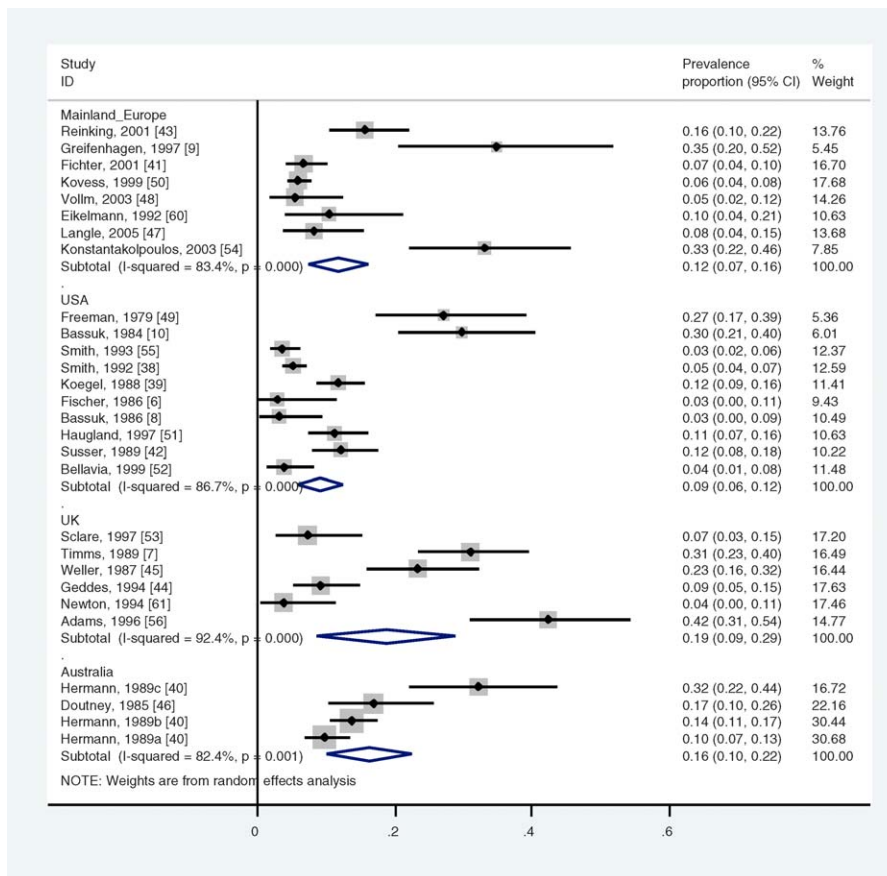

**Figure 2.** Prevalence of Psychosis in Homeless Persons by Country Group  
doi:10.1371/journal.pmed.0050225.g002

### Personality Disorder

We identified 14 surveys that reported personality disorder diagnoses in 2,413 homeless persons (Figure 4) [6–10,38,39,41,48,51,54,55,61]. The prevalence estimates ranged from 2.2% to 71.0%. The random effects pooled prevalence estimate was 23.1% (95% CI 15.5%–30.8%) ( $\chi^2 = 327.5$ ,  $p < 0.001$ ,  $I^2 = 96.0\%$ , 95% CI 94.6%–97.1%), with only one of the sample characteristics being significantly associated with this substantial heterogeneity on individual variable analysis: lower participation rates were associated with higher prevalences ( $\beta = 0.29$ ,  $se[\beta] = 0.08$ ,  $p < 0.001$ ) (Table 2).

### Alcohol Dependence

We identified ten surveys that reported alcohol dependence in 1,791 homeless men (Figure 4) [7,40,41,43,47,48,51,57,59,60]. The prevalence estimates ranged from 8.5% to 58.1%. The random effects pooled prevalence estimate was 37.9% (95% CI 27.8%–48.0%) ( $\chi^2 = 347.2$ ,  $p < 0.001$ ,  $I^2 = 96.8\%$ , 95% CI 95.7%–97.7%). Two factors were associated with this heterogeneity on individual but not multiple variable analysis. First, the more recent the study (as analysed by decade), the higher the prevalence of alcohol dependence ( $\beta = 0.18$ ,  $se[\beta] = 0.07$ ,  $p = 0.007$ , Figure 5). Second, surveys conducted in mainland Europe had higher prevalences of alcohol dependence ( $\beta = 0.21$ ,  $se[\beta] = 0.09$ ,  $p = 0.022$ ) (Table 2). We did not find any investigations of alcohol dependence in homeless women.

### Drug Dependence

We identified seven surveys in men that reported drug dependence (Figure 4) [40,41,43,47,48,51,58]. The prevalence estimates ranged from 4.7% to 54.2%. Random effects pooled prevalence estimate was 24.4% (95% CI 13.2%–35.6%) ( $\chi^2 = 221.1$ ,  $p < 0.001$ ,  $I^2 = 97.3\%$ , 95% CI 95.9%–98.2%), with none of the sample characteristics being significantly associated with this heterogeneity on individual variable analysis (Table 2). We found one report on drug dependence in homeless women ( $n = 33$ ) with a prevalence of 24.2% [58].

### Conclusion

This systematic review of serious mental disorders in homeless persons identified 29 surveys including 5,684 individuals. There are three main findings. First, the most common mental disorders appeared to be alcohol and drug dependence, with random effects pooled prevalence estimates of 37.9% (95% CI 27.8%–48.0%) and 24.4% (95% CI 13.2%–35.6%), respectively. Second, the prevalence estimates for psychosis were at least as high as those for depression, a finding in marked contrast from community estimates of these conditions [62,63], and in other at-risk groups such as prisoners [64] and refugees [65], in whom depression is more common. Third, although high prevalences were reported for serious mental disorders, their substantial heterogeneity suggests that service planning should not rely on our

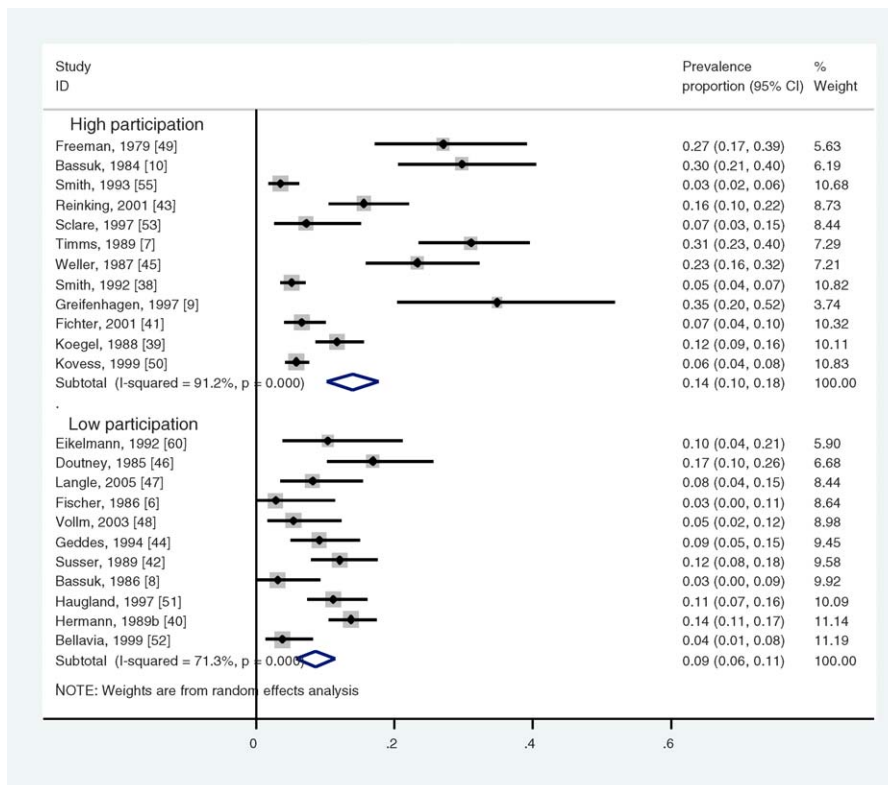

**Figure 3.** Prevalence of Psychosis in Homeless Persons by Participation Rate  
doi:10.1371/journal.pmed.0050225.g003

summary estimates but commission local surveys of morbidity to quantify mental health needs.

The substantial heterogeneity between the studies included in the review was not unexpected. Some of the variations between studies could be not explained by crude study characteristics (such as sex, study size, or geographic region), and this suggests that local factors such as provision of mental health and social services are likely to be important [66]. However, certain other study characteristics were associated with heterogeneity on meta-regression. These included, first, lower participation in surveys were associated with lower prevalences of psychosis. Second, interviewers with clinical

training were more likely to reporting lower prevalences of depression. Third, a higher prevalence of alcohol dependence was found in studies in more recent decades, possibly reflecting the increasing relative affordability of alcohol [67,68].

The prevalence of psychosis ranged between 3% and 42%, which is substantially higher than community estimates, which typically report 1%–2% when individuals are surveyed using diagnostic instruments [69], and up to 0.8% when only schizophrenia is reported [70]. We found no increase in the prevalence of psychosis by study period (in decades), in contrast with the views of some commentators [15,16]. The finding on meta-regression that the proportion of the

**Table 2.** Results of Individual Variable Meta-Regression Models for Each Diagnosis Showing Values of  $\beta$ ,  $se(\beta)$ , and the Significance of  $\beta$  for Each Study Characteristic

| Study Characteristic                                             | Psychosis                                  | Major Depression                             | Personality Disorder                         | Alcohol Dependence                        | Drug Dependence         |
|------------------------------------------------------------------|--------------------------------------------|----------------------------------------------|----------------------------------------------|-------------------------------------------|-------------------------|
| Instrument: semistructured versus clinical only                  | -0.08 (0.05) $p = 0.12$                    | 0.06 (0.05) $p = 0.18$                       | -0.10 (0.10) $p = 0.33$                      | 0.19 (0.13) $p = 0.15$                    | -0.16 (0.19) $p = 0.41$ |
| Interview: conducted by mental health clinician versus layperson | <b>0.08 (0.04) <math>p = 0.042</math></b>  | <b>-0.06 (0.03) <math>p = 0.058</math></b>   | 0.01 (0.10) $p = 0.96$                       | -0.02 (0.13) $p = 0.88$                   | -0.13 (0.13) $p = 0.31$ |
| Period of interview: decade                                      | -0.01 (0.03) $p = 0.64$                    | 0.01 (0.03) $p = 0.82$                       | -0.01 (0.07) $p = 0.90$                      | <b>0.18 (0.07) <math>p = 0.007</math></b> | 0.04 (0.11) $p = 0.72$  |
| Sex: mixed/male versus female                                    | -0.03 (0.03) $p = 0.27$                    | <b>-0.05 (0.02) <math>p = 0.043</math></b>   | -0.05 (0.07) $p = 0.51$                      | —                                         | —                       |
| Country: mainland Europe versus rest of the world                | -0.01 (0.05) $p = 0.90$                    | <b>-0.09 (0.04) <math>p = 0.024</math></b>   | 0.03 (0.11) $p = 0.81$                       | <b>0.12 (0.09) <math>p = 0.022</math></b> | 0.02 (0.14) $p = 0.91$  |
| Participation rate: >85% versus $\leq$ 85%                       | <b>-0.06 (0.03) <math>p = 0.071</math></b> | <b>0.13 (0.03) <math>p \leq 0.001</math></b> | <b>0.29 (0.08) <math>p &lt; 0.001</math></b> | 0.05 (0.14) $p = 0.72$                    | 0.23 (0.17) $p = 0.18$  |
| Size of study: $\geq$ 200 versus <200                            | <b>-0.08 (0.04) <math>p = 0.055</math></b> | -0.01 (0.04) $p = 0.73$                      | -0.02 (0.11) $p = 0.88$                      | -0.08 (0.11) $p = 0.48$                   | -0.14 (0.13) $p = 0.28$ |

Significant associations ( $p < 0.10$ ) are indicated in bold typeface.  
doi:10.1371/journal.pmed.0050225.t002

A

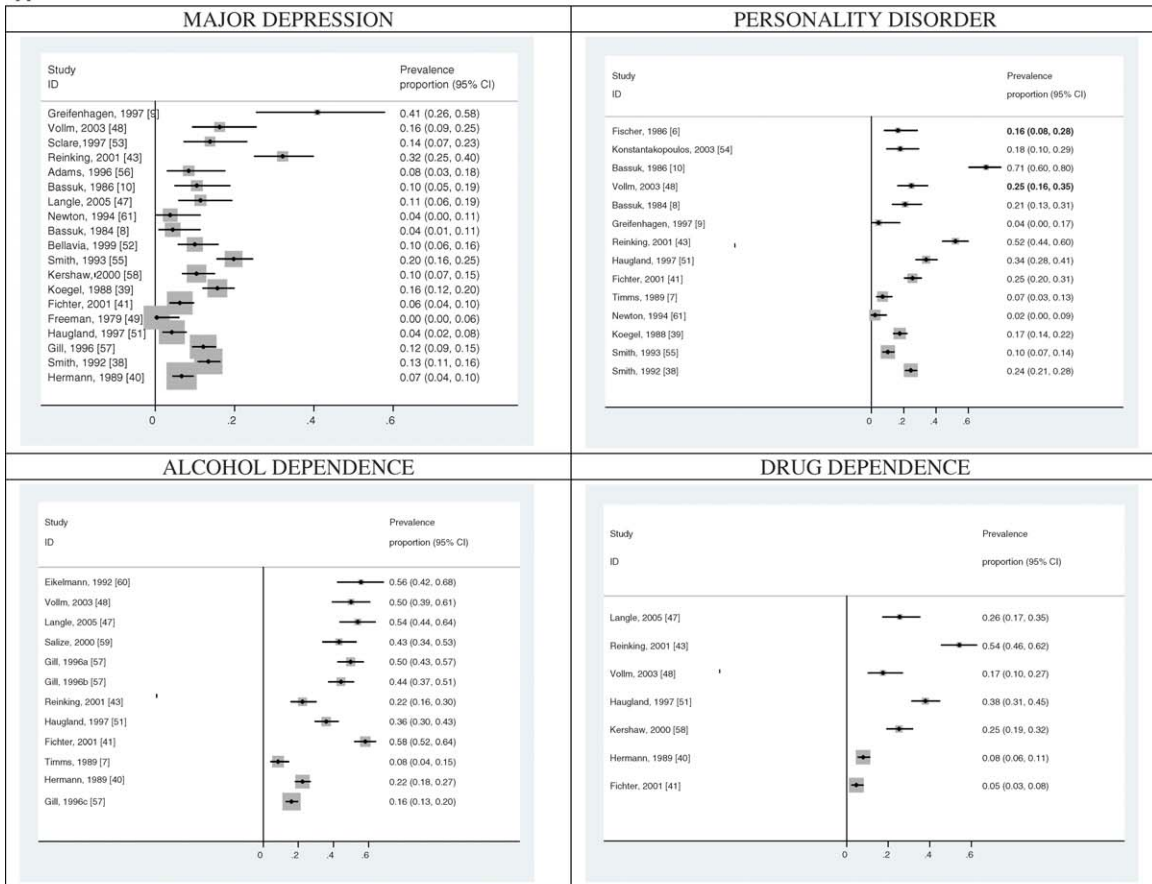

B

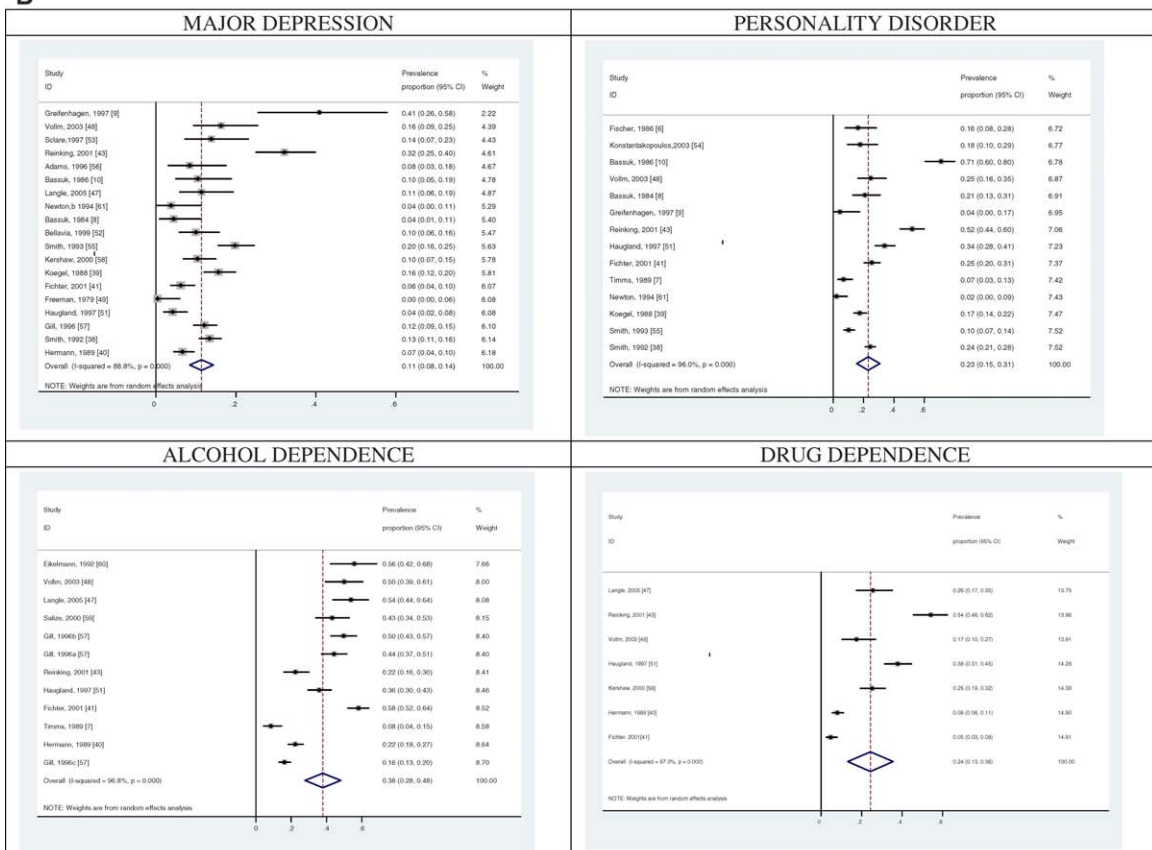



**Figure 4.** Prevalence of Major Depression, Personality Disorder, Alcohol Dependence, and Drug Dependence in Homeless People  
 (A) Studies are ordered by increasing study weight in a fixed effects model without calculation of an overall estimate.  
 (B) Studies are ordered by increasing study weight and show the overall estimate calculated from random effects meta-analysis.  
 doi:10.1371/journal.pmed.0050225.g004

individuals who participated was significantly associated with these prevalences suggests that researchers in the field need to interpret their findings in light of response rates. Reasons for nonparticipation in research may be related to severe mental illness, and investigators should consider gathering information from other sources to estimate the degree of underestimation or attempt to reinterview those who did not participate initially.

Although the proportionate excess for psychosis was greater than for the other mental disorders, this review found that the main mental health problem for homeless persons is alcohol dependence, which ranged from 8% to 58%. On average, this is many orders of magnitude higher in men and even higher in women compared with community surveys [62,63]. The range for drug dependence were 5%–54%, a proportionate excess higher in women than men compared with community surveys [62,63]. The increased prevalence for drug dependence in both sexes may contribute to the reported increased crime rates in the homeless [20,21,22], as substance abuse and dependence is an important risk factor, either alone [71] or comorbid with psychosis [21].

The prevalence of depression in this review, with a pooled prevalence estimate of 11.4% (95% CI 8.4%–14.4%), range at 0% to 41%, was lower than expected. Many estimates included in the review were similar to community estimates of depression in women (which range from 7% to 11% for 1-y estimates), and only slightly higher than general population rates for men [62,72]. While levels of comorbidity of

depression are likely to be underreported in homeless persons with psychosis or drug dependence, these estimates suggest that the reported high rates of suicide in homeless people [5,18] may not be mediated through depressive illness, and that other risk factors, such as alcohol dependence, may be more relevant [73]. The finding that clinically trained interviewers were associated with lower prevalence estimates is consistent with a systematic review of major depressive disorder in prisoners [64], and suggests that studies of the diagnostic validity of depression using different types of interviewer should be researched. In terms of the prevalence of personality disorder in the homeless, we found that the estimates varied widely (range 2.2%–71.0%), and all but one reported rates higher than the 4.4% found in a recent community survey [74]. The presence of personality disorder is associated with poorer outcomes for treatment of depression [75] and increased risk of deliberate self-harm [76].

One of the findings of this review is that future research in homeless populations should provide clear definitions of the sample interviewed and breakdowns by type of homelessness category (whether it be roofless or temporary accommodation). Although we identified and excluded from the review one study from a non-Western population (South Korea) [77], it highlighted the need for research in non-Western countries. Longitudinal studies of cohorts of the mentally ill would help clarify the risk for, temporal sequence of, and pathways into homelessness, and identify risk factors and those associated with desistance for homelessness in such populations.

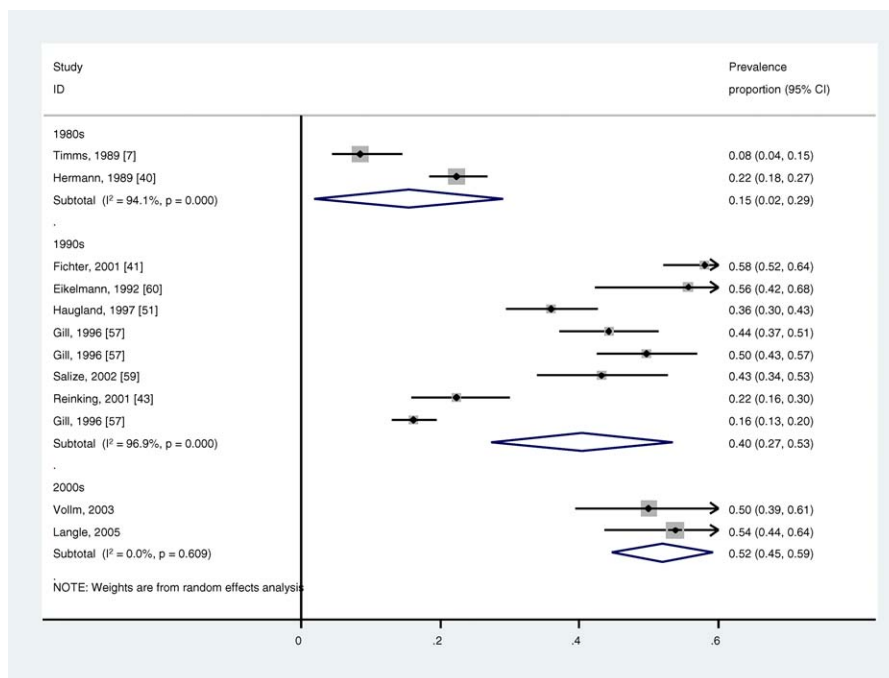

**Figure 5.** Prevalence of Alcohol Dependence in Homeless Persons by Decade  
 doi:10.1371/journal.pmed.0050225.g005

A number of implications for health services for the homeless arise from this review. Integrating treatment for mental illness, substance dependence, and housing interventions should be considered for many homeless persons [78,79], and hospital admission may be required for treatment for a number with psychotic illness. Local surveys are needed to inform service needs. However, traditional models of service delivery in Western countries, which focus on those with severe mental illness, may not meet the mental health needs of most homeless people who suffer from substance dependence and personality disorder. Even when mentally ill homeless persons receive adequate mental health services, a range of unmet welfare and housing needs may remain, implying that normal community mental health service provision is usually insufficient [80]. With many millions of individuals being homeless in Western countries, current mental health provision may need review, and models of psychiatric and social care that can best meet the burden of mental illness will need further investigation.

## Supporting Information

### Text S1. MOOSE Checklist

Found at doi:10.1371/journal.pmed.0050225.sd001 (63 KB DOC).

## Acknowledgments

We are grateful to B. Eikelman, B. Vollm, C. North, G. M. Lovisi, P. Timms, and P. Joseph for providing further information about their studies, and to J. Enayati for translations from German. We are also grateful to Dr M. Ashraf for assistance with the initial search.

**Author contributions.** SF and JG designed the study. SF, HD, and JG analyzed the data. SF wrote the first draft of the paper. SF, VK, HD, and JG contributed to the writing of the paper. VK performed the literature search, review of literature, and, with SF, extraction of data.

## References

- Crisis (2003) How many and how much: Single homelessness and the question of numbers and cost. London: Crisis UK.
- Homelessness Research Institute. (2007) Homelessness counts. Washington (D.C): National Alliance to End Homelessness.
- Martens W (2001) A review of physical and mental health in homeless persons. *Public Health Rev* 29: 13–33.
- Barrow SM, Herman DB, Cordova P, Struening EL (1999) Mortality among homeless shelter residents in New York City. *Am J Public Health* 89: 529–534.
- Babidge NC, Buhrich N, Butler T (2001) Mortality among homeless people with schizophrenia in Sydney, Australia: A ten year follow-up. *Acta Psychiatr Scand* 103: 105–110.
- Fischer PJ, Shapiro S, Breakey WR, Anthony JC, Kramer M (1986) Mental health and social characteristics of the homeless: A survey of mission users. *Am J Public Health* 76: 519–524.
- Timms PW, Fry AH (1989) Homelessness and mental illness. *Health Trends* 21: 70–71.
- Bassuk EL, Rubin L, Lauriat A (1984) Is homelessness a mental health problem? *Am J Psychiatry* 141: 1546–1550.
- Greifenhagen A, Fichter M (1997) Mental illness in homeless women: An epidemiological study in Munich, Germany. *Eur Arch Psychiatry Clin Neurosci* 247: 162–172.
- Bassuk EL, Rubin L, Lauriat AS (1986) Characteristics of sheltered homeless families. *Am J Public Health* 76: 1097–1101.
- Fischer PJ (1989) Estimating the prevalence of alcohol, drug and mental health problems in the contemporary homeless population: a review of the literature. *Contemp Drug Probl* 16: 333–390.
- Appleby L, and Desai PN (1985) Documenting the relationship between homelessness and psychiatric hospitalization. *Hosp Comm Psychiatry* 37: 732–737.
- Wright J, Lam J (1987) Homelessness and the low-income housing supply. *Soc Policy* 17: 48–53.
- Kushel M, Vittinghoff E, Haas J (2001) Factors associated with the health care utilization of homeless persons. *JAMA* 285: 200–206.
- Lamb HR (1984) Deinstitutionalisation and the homeless mentally ill. *Hosp Comm Psychiatry* 35: 899–907.
- North CS, Eyrich KM, Pollio DE, Spitznagel EL (2004) Are rates of psychiatric disorders in the homeless population changing? *Am J Public Health* 94: 103–108.
- Teeson M (1990) Prevalence of schizophrenia in a refuge for homeless men: A five year follow-up. *Psychiatric Bull* 14: 597–600.
- Prigerson HG, Desai RA, Liu-Mares W, Rosenheck RA (2003) Suicidal ideation and suicide attempts in homeless mentally ill persons: Age-specific risks of substance abuse. *Soc Psychiatry Psychiatr Epidemiol* 38: 213–219.
- Walsh E, Moran P, Scott C, McKenzie K, Burns T, et al. (2003) Prevalence of violent victimisation in severe mental illness. *Br J Psychiatry* 183: 233–238.
- Gelberg L, Linn LS, Leake BD (1988) Mental health, alcohol and drug use, and criminal history among homeless adults. *Am J Psychiatry* 145: 191–196.
- Brennan P, Mednick S, Hodgins S (2000) Major mental disorders and criminal violence in a Danish birth cohort. *Arch Gen Psychiatry* 57: 494–500.
- Fazel S, Grann M (2006) The population impact of severe mental illness on violent crime. *Am J Psychiatry* 163: 1397–1403.
- Morse G, Shields NM, Hanneke CR, McCall GJ, Calsyn RJ, et al. (1986) St. Louis's homeless: Mental health needs, services, and policy implications. *Psychosocial Rehab J* 9: 39–50.
- Bassuk EL, Buckner JC, Perloff JN, Bassuk SS (1998) Prevalence of mental health and substance use disorders among homeless and low-income housed mothers. *Am J Psychiatry* 155: 1561–1564.
- Teesson S, Hodder T, Buhrich N (2000) Substance use disorders among homeless people in inner Sydney. *Soc Psychiatr Psychiatr Epidemiol* 35: 451–456.
- Teesson M, Hodder T, Buhrich N (2004) Psychiatric disorders in homeless men and women in inner Sydney. *Aust N Z J Psychiatry* 38: 162–168.
- Virgona A, Buhrich N, Teesson M (1993) Prevalence of schizophrenia among women in refuges for the homeless. *Aust N Z J Psychiatry* 27: 405–410.
- Vazquez C, Munoz M, Sanz J (1997) Lifetime and 12-month prevalence of DSM-III-R mental disorders among the homeless in Madrid: A European study using the CIDI. *Acta Psychiatr Scand* 95: 523–530.
- Lovisi G, Mann A, Coutinho E, Morgado A (2004) Mental illness in an adult sample admitted to public hostels in the Rio de Janeiro metropolitan area, Brazil. *Soc Psychiatr Psychiatr Epidemiol* 38: 493–498.
- Priest RG (1976) The homeless person and the psychiatric services: an Edinburgh survey. *Br J Psychiatry* 128: 128–136.
- Reilly JJ, Herrman HE, Clarke DM, Neil CC, McNamara CL (1994) Psychiatric disorder in and service use by young homeless people. *Med J Aust* 161: 429–432.
- Vostanis P, Grattan E, Cumella S (1998) Mental health problems of homeless children and families: longitudinal study. *BMJ* 316: 899–902.
- Freeman M, Tukey J (1950) Transformations related to the angular and the square root. *Ann Math Stats* 4: 607–611.
- Wilson E (1927) Probable inference, the law of succession, and statistical inference. *J Am Stat Assoc* 22: 209–212.
- Newcombe R (1998) Two-sided confidence intervals for the single proportion: comparison of seven methods. *Stats Med* 17: 857–872.
- Higgins J, Thompson S, Deeks J, Altman D (2003) Measuring inconsistency in meta-analyses. *BMJ* 327: 557–560.
- Higgins J, Thompson S (2002) Quantifying heterogeneity in a meta-analysis. *Stats Med* 21: 1539–1558.
- Smith EM, North CS, Spitznagel EL (1992) A systematic study of mental illness, substance abuse, and treatment in 600 homeless men. *Ann Clin Psychiatry* 4: 111–120.
- Koegel P, Burnam MA, Farr RK (1988) The prevalence of specific psychiatric disorders among homeless individuals in the inner city of Los Angeles. *Arch Gen Psychiatry* 45: 1085–1092.
- Herrman H, McGorry P, Bennett P, Van Riel R, Singh B (1989) Prevalence of severe mental disorders in disaffiliated and homeless people in inner Melbourne. *Am J Psychiatry* 146: 1179–1184.
- Fichter MM, Quadflieg N (2001) Prevalence of mental illness in homeless men in Munich, Germany: Results from a representative sample. *Acta Psychiatr Scand* 103: 94–104.
- Susser E, Struening EL, Conover S (1989) Psychiatric problems in homeless men. Lifetime psychosis, substance use, and current distress in new arrivals at New York City shelters. *Arch Gen Psychiatry* 46: 845–850.
- Reinking DP, Wolf JR, Kroon H (2001) Hoge prevalentie van psychische stoornissen en verslavingsproblemen bij daklozen in de stad Utrecht [High prevalence of mental disorders and addiction problems among the homeless in Utrecht]. *Ned Tijdschr Geneesk* 145: 1161–1166.
- Geddes J, Newton R, Young G, Bailey S, Freeman C, et al. (1994) Comparison of prevalence of schizophrenia among residents of hostels for homeless people in 1966 and 1992. *BMJ* 308: 816–819.
- Weller BG, Weller MP, Coker E, Mahomed S (1987) Crisis at Christmas 1986. *Lancet* 1: 553–554.
- Doutney CP, Buhrich N, Virgona A, Cohen A, Daniels P (1985) The prevalence of schizophrenia in a refuge for homeless men. *Aust N Z J Psychiatry* 19: 233–238.
- Langle G, Egarter B, Albrecht F, Petrasch M, Buchkremer G (2005) Prevalence of mental illness among homeless men in the community - Approach to a full census in a southern German university town. *Soc Psychiatry Psychiatr Epidemiol* 40: 382–390.

48. Vollm B, Becker H, Kunstmann W (2004) Psychiatrische Morbidität bei allein stehenden wohnungslosen Männern [Psychiatric morbidity in homeless single men]. *Psychiatr Prax* 31: 236–240.
49. Freeman SJ, Formo A, Alampur AG, Sommers AF (1979) Psychiatric disorder in a skid-row mission population. *Compr Psychiatry* 20: 454–462.
50. Kovess V, Mangin Lazarus C (1999) The prevalence of psychiatric disorders and use of care by homeless people in Paris. *Soc Psychiatry Psychiatr Epidemiol* 34: 580–587.
51. Haugland G, Siegel C, Hopper K, Alexander MJ (1997) Mental illness among homeless individuals in a suburban county. *Psychiatr Serv* 48: 504–509.
52. Bellavia CW, Toro PA (1999) Mental disorder among homeless and poor people: a comparison of assessment methods. *Community Ment Health J* 35: 57–67.
53. Sclare PD (1997) Psychiatric disorder among the homeless in Aberdeen. *Scot Med J* 42: 173–177.
54. Konstantakopoulos G, Kakoulas I, Valma V, Stamatogiannopoulou E, Giotakos O, et al. (2003) Mental disorders and dual diagnosis in a sample of homeless people in Athens. *Annals Gen Hosp Psychiatry* 2: S113.
55. Smith EM, North CS, Spitznagel EL (1993) Alcohol, drugs, and psychiatric comorbidity among homeless women: an epidemiologic study. *J Clin Psychiatry* 54: 82–87.
56. Adams CE, Pantelis C, Duke PJ, Barnes TR (1996) Psychopathology, social and cognitive functioning in a hostel for homeless women. *Br J Psychiatry* 168: 82–86.
57. Gill B, Meltzer H, Hinds K, Petticrew M (1996) Psychiatric morbidity among homeless people. London: HMSO.
58. Kershaw A, Singleton N, Meltzer H (2000) Substance misuse and mental disorder among homeless people in Glasgow. London: ONS.
59. Salize HJ, Dillmann-Lange C, Stern G, Kentner-Figura B, Stamm K, et al. (2002) Alcoholism and somatic comorbidity among homeless people in Mannheim, Germany. *Addiction* 97: 1593–1600.
60. Eikermann B, Inhester ML, Reker T (1992) Psychische Störungen bei nichtsesshaften Männern. Defizite in der psychiatrischen Versorgung? *Sozialpsychiatrische Informationen* 2: 29–32.
61. Newton JR, Geddes JR, Bailey S, Freeman CP, McAleavy A, et al. (1994) Mental health problems of the Edinburgh 'roofless'. *Br J Psychiatry*: 537–540.
62. Kessler R, McGonagle K, Zhao S (1994) Lifetime and 12-month prevalence of DSM-III-R psychiatric disorders in the United States. *Arch Gen Psychiatry* 51: 8–19.
63. Kessler RC, Chiu WT, Demler O, Walters EE (2005) Prevalence, severity, and comorbidity of 12-month DSM-IV disorders in the national comorbidity survey replication. *Arch Gen Psychiatry* 62: 617–627.
64. Fazel S, Danesh J (2002) Serious mental disorder in 23 000 prisoners: a systematic review of 62 surveys. *Lancet* 359: 545–550.
65. Fazel M, Wheeler J, Danesh J (2005) Prevalence of serious mental disorder in 7000 refugees resettled in western countries: A systematic review. *Lancet* 365: 1309–1314.
66. Tischler V, Cumella S, Bellerby T, Vostanis P (2000) Service innovations: A mental health service for homeless children and families. *Psychiatr Bull* 24: 339–341.
67. Farrell S, Manning WG, Finch MD (2003) Alcohol dependence and the price of alcoholic beverages. *J Health Econ* 22: 117–147.
68. Room R (2005) Alcohol and public health. *Lancet* 365: 519.
69. Robins R, Reiger D (1991) Psychiatric disorders in America: The Epidemiologic Catchment Area Study. New York: The Free Press.
70. Saha S, Chant D, Welham J, McGrath J (2005) A systematic review of the prevalence of schizophrenia. *PLoS Medicine* 2: e141. doi:10.1371/journal.pmed.0020141
71. Grann M, Fazel S (2004) Substance misuse and violent crime: Swedish population study. *BMJ* 328: 1233–1234.
72. Kessler RC, Berglund P, Demler O, Jin R, Koretz D, et al. (2003) The Epidemiology of Major Depressive Disorder: Results From the National Comorbidity Survey Replication (NCS-R). *JAMA* 289: 3095–3105.
73. Cavanagh J, Carson A, Sharpe M, Lawrie S (2003) Psychological autopsy studies of suicide: a systematic review. *Psychol Med* 33: 395–405.
74. Coid J, Yang M, Tyrer P, Roberts A, Ullrich S (2006) Prevalence and correlates of personality disorders in Great Britain. *Br J Psychiatry* 188: 423–431.
75. Newton-Howes G, Tyrer P, Johnson T (2006) Personality disorder and the outcome of depression: meta-analysis of published studies. *Br J Psychiatry* 188: 13–20.
76. Hawton K, Houston K, Haw C, Townsend E, Harriss L (2003) Comorbidity of axis I and axis II disorders in patients who attempted suicide. *Am J Psychiatry* 160: 1494–1500.
77. Han OS, Lee HB, Ahn JH, Park JI, Cho MJ, et al. (2003) Lifetime and current prevalence of mental disorders among homeless men in Korea. *J Nerv Ment Dis* 4: 272–275.
78. Drake R, Yovetich N, Bebout R, Harris M, McHugo G (1997) Integrated treatment for dually diagnosed homeless adults. *J Nerv Ment Dis* 185: 298–305.
79. Goldfinger SM, Schutt RK, Tolomiczenko GS, Seidman L, Penk WE, et al. (1999) housing placement and subsequent days homeless among formerly homeless adults with mental illness. *Psychiatr Serv* 50: 674–679.
80. Herrman H, Evert H, Harvey C, Gureje O, Pinzone T, et al. (2004) Disability and service use among homeless people living with psychotic disorders. *Aust N Z J Psychiatry* 38: 965–974.

## Editors' Summary

**Background.** In 2007, it was estimated that there were more than 1 million homeless people worldwide. The true magnitude of the problem is difficult to estimate with no internationally agreed definition for homelessness and with the different approaches taken by countries and organizations in counting homeless people.

What we do know is that this is a diverse group of people who have poorer physical and mental health than the general population, leading to premature death. We also know that addressing barriers to health care and behavioral interventions for alcohol and drug dependence and mental health problems in this population can lead to lasting health gains.

**Why Was This Study Done?** Health care for the homeless is a major public health challenge. Public policy and health service development depend on reliable estimates of the prevalence (how common a particular characteristic, e.g., a disease, is in a specific group of people or a specific population) of illnesses. By using statistical methods, the researchers aimed to provide a quantitative synthesis of the available evidence on mental health problems in this population and explore reasons for the differences in reported prevalence rates of serious mental disorders between studies, neither which have been done previously.

**What Did the Researchers Do and Find?** The researchers systematically searched for surveys that estimated the prevalence of mental disorders in homeless people. Their final sample of 29 studies included a total of 5,684 homeless individuals based in the US, UK, mainland Europe, and Australia. Their main finding was that the prevalences of serious mental disorders were raised compared with expected rates in the general population, and many orders of magnitude higher than age-matched community estimates for psychosis, alcohol dependence, and drug dependence. In addition, the analysis found that alcohol and drug dependence is the most common mental disorder in the homeless (compared to psychosis, depression, and personality disorder). Also, the prevalence estimates of psychosis were found to be as high as those for depression. This latter finding contrasts with community estimates and other “at risk” populations such as prisoners and refugees, where depression is more common. The authors found substantial variation in the prevalence rates for these various disorders, and demonstrated that participation rates were associated with these variations for psychosis,

depression, and personality disorder and that studies conducted more recently reported higher rates of alcohol dependence.

**What Do These Findings Mean?** This review raises a number of implications for health services for the homeless and research for this population. First, traditional models of service delivery, which focus on those with severe mental illness, may not meet the mental health needs of most homeless people who suffer from alcohol and drug dependence and personality disorder. Second, an integrated approach to treatment may be beneficial and should take into account mental health, alcohol and drug abuse, welfare, and housing needs. Finally, future research should include studies that follow a group over time to help us better understand the risks and pathways into (and out of) homelessness, particularly in non-Western populations where there appears to be a paucity of information.

**Additional Information.** Please access these Web sites via the online version of this summary at <http://dx.doi.org/10.1371/journal.pmed.0050225>.

- This study is further discussed in a *PLoS Medicine* Perspective by Helen Herrman
- “How can health care systems effectively deal with the major health care needs of homeless people?” is a WHO initiative aimed at tackling the health care needs of homeless people
- FEANTSA, the European Federation of National Organizations Working with the Homeless, is an umbrella of not-for-profit organizations that participate in or contribute to the fight against homelessness in Europe
- The National Alliance to End Homelessness is a nonpartisan, mission-driven organization committed to preventing and ending homelessness in the US
- Information and good practice solutions for the homelessness service sector in Australia can be found on the National Homelessness Information Clearinghouse Web site
- Homeless Link is the national membership organization for frontline homelessness agencies in England with a mission to catalyze an end to homelessness
- Homeless Man Speaks provides an “on-the-street” perspective

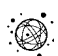

Source: https://journals.plos.org/plosmedicine/article/file?id=10.1371%2Fjournal.pmed.0050225
